# Supplementary material
Source: publisher site journal article supplement (https://www.dovepress.com/article/supplementary_file/599331/599331%20Supplementary%20Material.docx)
Supplement: Supplementary file 1 [file 599331%20Supplementary%20Material.docx]

**Supplementary Table S1. Univariable ordered Logistic Regression Analysis of EQ-5D-5L Domains in Elderly AF Patients**

| **Domain** | OR (95%CI) | P |
| --- | --- | --- |
| **Mobility** |  |  |
| **Age** |  |  |
| ＜75 years | 1.00 (Reference) |  |
| ≥75 years | 6.27 (2.84-13.84) | **<.001** |
| **Condition of exercise** |  |  |
| No exercise | 1.00 (Reference) |  |
| Occasional exercise | 0.64 (0.30-1.38) | 0.260 |
| More exercise | 0.24 (0.09-0.63) | **0.004** |
| **Self-care** |  |  |
| **Age** |  |  |
| ＜75 years | 1.00 (Reference) |  |
| ≥75 years | 15.99 (6.51-39.25) | **<.001** |
| **Ethnic groups** |  |  |
| The Han nationality | 1.00 (Reference) |  |
| Minority nationality | 0.28 (0.13-0.61) | **0.002** |
| **Condition of exercise** |  |  |
| No exercise | 1.00 (Reference) |  |
| Occasional exercise | 0.38 (0.17-0.84) | **0.016** |
| More exercise | 0.05 (0.01-0.22) | **<.001** |
| **Usual activities** |  |  |
| **Age** |  |  |
| ＜75 years | 1.00 (Reference) |  |
| ≥75 years | 12.85 (2.86-57.62) | **<.001** |
| **Ethnic groups** |  |  |
| The Han nationality | 1.00 (Reference) |  |
| Minority nationality | 0.19 (0.06-0.57) | **0.003** |
| **Medication adherence** |  |  |
| No medication | 1.00 (Reference) |  |
| regular medication | 0.13 (0.02-0.76) | **0.024** |
| irregular medication | 0.19 (0.03-1.14) | 0.070 |
| **Pain/discomfort** |  |  |
| **Sex** |  |  |
| Male | 1.00 (Reference) |  |
| Female | 0.55 (0.27-1.10) | 0.089 |
| **Age** |  |  |
| ＜75 years | 1.00 (Reference) |  |
| ≥75 years | 3.99 (1.91-8.34) | **<.001** |
| **Ethnic groups** |  |  |
| The Han nationality | 1.00 (Reference) |  |
| Minority nationality | 0.28 (0.13-0.59) | **<.001** |
| **Medication adherence** |  |  |
| No medication | 1.00 (Reference) |  |
| regular medication | 0.29 (0.07-1.11) | 0.071 |
| irregular medication | 0.17 (0.04-0.73) | **0.017** |
| **Condition of exercise** |  |  |
| No exercise | 1.00 (Reference) |  |
| Occasional exercise | 0.63 (0.29-1.36) | 0.240 |
| More exercise | 0.29 (0.11-0.78) | **0.014** |
| **Anxiety/depression** |  |  |
| **Sex** |  |  |
| Male | 1.00 (Reference) |  |
| Female | 0.44 (0.22-0.90) | **0.025** |
| **Age** |  |  |
| ＜75 years | 1.00 (Reference) |  |
| ≥75 years | 2.54 (1.24-5.18) | **0.011** |
| **Ethnic groups** |  |  |
| The Han nationality | 1.00 (Reference) |  |
| Minority nationality | 0.16 (0.07-0.36) | **<.001** |
| **Medication adherence** |  |  |
| No medication | 1.00 (Reference) |  |
| regular medication | 2.30 (0.50-10.58) | 0.286 |
| irregular medication | 1.87 (0.38-9.29) | 0.442 |
| **Condition of exercise** |  |  |
| No exercise | 1.00 (Reference) |  |
| Occasional exercise | 0.82 (0.38-1.77) | 0.607 |
| More exercise | 0.34 (0.12-0.93) | **0.035** |

Bold P-values indicate statistical significance (P < 0.05).
